# Supplementary figures and images for: Duodenal Permeability Is Associated With Mucosal Microbiota in Compensated Cirrhosis
Source: PubMed Central journal article supplement — Clin Transl Gastroenterol. 2022 Aug 22;13(10):e00522. doi: 10.14309/ctg.0000000000000522 (PMC9624490; doi:10.14309/ctg.0000000000000522), 2022-08-22

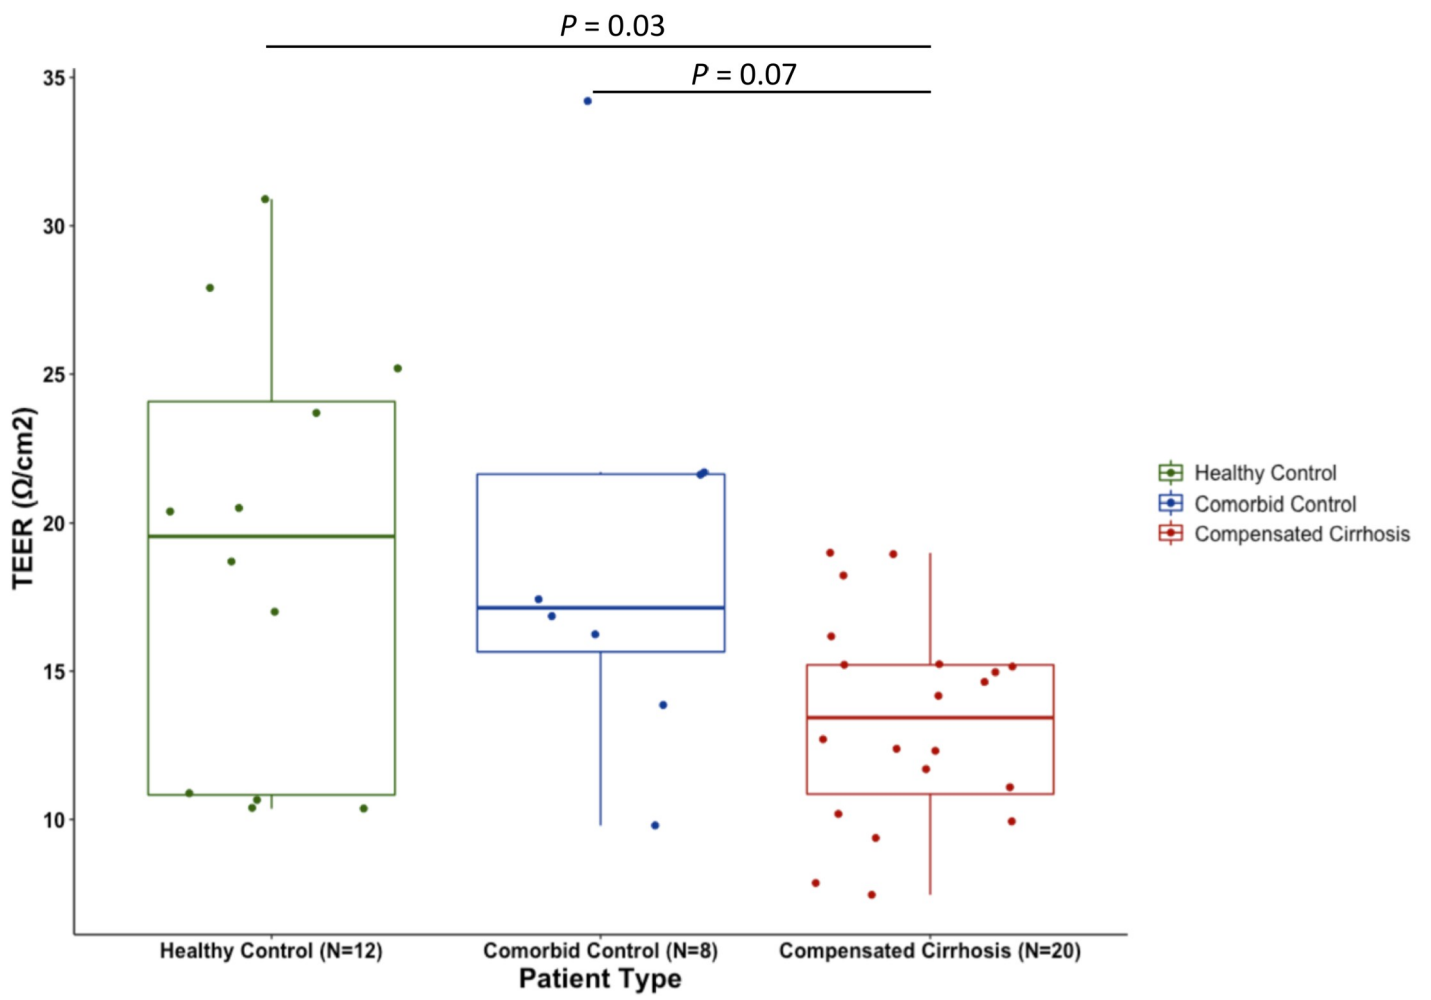

Supplement: ct9-13-e00522-s002.pdf [file ct9-13-e00522-s002.pdf]
